## Count does not recover major events of gene flux in real biological data

Nils Kapust<sup>1</sup>, Shijulal Nelson-Sathi<sup>2</sup>, Barbara Schönfeld<sup>3</sup>, Einat Hazkani-Covo<sup>4</sup>, David Bryant<sup>5</sup>,  
Peter J. Lockhart<sup>6</sup>, Mayo Röttger<sup>1</sup>, Joana C. Xavier<sup>\*</sup>, William F. Martin<sup>1</sup>

<sup>1</sup> Institute of Molecular Evolution, Heinrich Heine University, Universitätsstr. 1 40225  
Düsseldorf, Germany

<sup>2</sup> Computational Biology & Bioinformatics Group, Rajiv Gandhi Centre for  
Biotechnology, Trivandrum, Kerala, India

<sup>3</sup> School of Zoology, University of Tasmania, Private Bag 5, Hobart, Tasmania 7001,  
Australia.

<sup>4</sup> Department of Natural and Life Sciences, The Open University of Israel, Ra'anana  
43107, Israel.

<sup>5</sup> Department of Mathematics and Statistics, University of Otago, Dunedin 9054, New  
Zealand.

<sup>6</sup> Institute of Fundamental Sciences, Massey University, Palmerston North 4474, New  
Zealand.

\* Author for correspondence: Joana C. Xavier, Institute of Molecular Evolution, Heinrich-  
Heine-University, Universitätsstr. 1 40225 Düsseldorf, Germany, Tel.: +49 211 81-4932, Fax:  
+49 211 81-13554, email: [xavier@hhu.de](mailto:xavier@hhu.de)

## Abstract

1           In prokaryotes, known mechanisms of lateral gene transfer (transformation,  
2 transduction, conjugation and gene transfer agents) generate new combinations of genes  
3 among chromosomes during evolution. In eukaryotes, whose host lineage is descended from  
4 archaea, lateral gene transfer from organelles to the nucleus occurs at endosymbiotic events.  
5 Recent genome analyses studying gene distributions have uncovered evidence for sporadic,  
6 discontinuous events of gene transfer from bacteria to archaea during evolution. Other studies  
7 have used traditional birth-and-death phylogenetic models to investigate prokaryote genome  
8 evolution to claim that gene transfer to archaea was continuous during evolution, rather than  
9 involving occasional periodic mass gene influx events. Here we test the ability of Count, a  
10 birth-and-death based program, to recover known events of mass acquisition and differential  
11 loss using plastid genomes and eukaryotic protein families that were acquired from plastids.  
12 Count showed a strong bias towards reconstructed histories having gene acquisitions  
13 distributed uniformly across the tree. Sometimes as many as nine different acquisitions by  
14 plastid DNA were inferred for the same protein family. That is, Count recovered gradual and  
15 continuous lateral gene transfer among lineages, even when massive gains followed by  
16 gradual differential loss is the true evolutionary process that generated the gene distribution  
17 data.

18

## 19 **Keywords**

20           LGT; archaea; evolutionary models; plastid genomes

21

## 22 **Introduction**

23           Lateral gene transfer (LGT) has had a major impact on gene distributions among  
24 archaeal chromosomes during evolution (Wagner et al. 2017). There are basically two ways to

25 infer the evolutionary processes underlying gene distributions. One approach is to construct  
26 phylogenetic trees for all proteins in a given set of genomes and to compare topologies in  
27 search of phylogenetic congruence or incongruence, evoking vertical inheritance to account  
28 for the former and LGT to account for the latter. Despite the occurrence of historical events of  
29 lateral gene transfer among prokaryotes, applications of this approach have nevertheless  
30 generally led to phylogenetic reconstructions favoring a single dominant underlying  
31 prokaryotic tree (e.g. Daubin et al. 2003). One limitation of this investigative approach, and  
32 thus the conclusions evidenced, is that it is hampered by the circumstance that the vast  
33 majority of genes in prokaryotes occur in only a very few genomes (Dagan and Martin 2007).  
34 Genes present in only two or three genomes will appear to have been vertically inherited in all  
35 trees, and  $\geq 1/3$  of all genes present in four genomes will also appear to be vertically inherited  
36 by phylogenetic congruence criteria alone. The problem with this potential methodological  
37 bias is that it will inflate ancestral genome sizes to unacceptably large values if one looks at  
38 all genes (Dagan and Martin 2007), not just the ones for which trees are convenient to  
39 construct.

40         A different and still relatively new approach to investigate the factors underlying  
41 gene distributions is to cluster all protein coding genes in a given set of genomes into protein  
42 families and to examine not only the presence and absence patterns (PAPs) of those genes  
43 along a given reference tree, but also the phylogenies for each individual cluster (Nelson Sathi  
44 et al. 2012; Ku et al. 2015). When applied to archaea, this approach uncovered that  
45 haloarchaea acquired about 1000 genes from bacteria in a process that transformed a  
46 chemolithoautotrophic methanogen ancestor into a facultative aerobic heterotroph (Nelson-  
47 Sathi et al. 2012) and that gene acquisitions from bacteria followed by extensive differential  
48 loss was important in the origin and evolution of several major archaeal clades (Nelson-Sathi  
49 et al. 2015). The same fundamental pattern is observed in eukaryote evolution, where the host

50 lineage is thought to descend from archaea (Martin and Müller 1998; Williams et al. 2013;  
51 McInerney et al. 2014; Zaremba-Niedzwiedzka et al. 2017), namely events of mass gene  
52 acquisition followed by differential loss (Ku et al. 2015), which is increasingly considered a  
53 very important factor in genome evolution (Albalat and Cañestro 2016).

54 Yet another approach to understand gene distributions is to try to reconcile all  
55 topologies, all gene duplications, all gene losses, and all gene transfers simultaneously from a  
56 given data set (Szöllősi et al. 2015a). The trouble with this approach is that the number of  
57 parameters in such a model becomes very large, and there is the risk of overparameterization  
58 of models and of falling prey to statistical artefacts, as was recently observed for analyses of  
59 gene phylogenies addressing mitochondrial origin (Martin et al. 2017a).

60 Recently, Groussin et al. (2016) reanalyzed the data of Nelson-Sathi et al. (2015)  
61 using a program called Count (Csűrös, 2010). Count takes a given set of PAPs that is  
62 determined independently of a reference tree and distributes them across the reference tree  
63 allowing LGT and losses (birth-and-death) according to pre-specified parameters that  
64 correspond to settings in the Count software. Groussin et al. found basically the same amount  
65 of LGT as Nelson-Sathi et al. (2015) found, but Count distributed the LGTs across the  
66 reference tree in such a way as to evenly distribute gains and losses according to the settings  
67 of the Count program. From that result, they concluded that LGT was mostly uniform and  
68 continuous during archaeal evolution (Groussin et al. 2016), not episodic (Nelson-Sathi et al.  
69 2015). However, the same Count method also infers vast amounts of continuous LGT during  
70 eukaryote evolution (Szöllősi et al. 2015b), even though there are no known genetic  
71 mechanisms for LGT among eukaryotes (Martin 2017), in contrast to the very well  
72 characterized mechanisms of LGT among prokaryotes (Popa and Dagan 2011). There are  
73 reasons to suspect that the amounts of LGT that Szöllősi et al. (2015b) found for fungi  
74 (eukaryotes) are methodological artefacts, because if eukaryotes were exchanging genes



75 freely across higher taxonomical boundaries then eukaryote genomes should exhibit  
76 cumulative effects of LGT as prokaryote genomes do, but the converse is observed (Martin  
77 2017). Moreover, genome-scale tests for eukaryote LGT show that gene evolution in  
78 eukaryotes is vertical, mediated by loss and punctuated by gene acquisitions at endosymbiotic  
79 events (Ku et al. 2015; Ku and Martin 2016).

80 Count makes a large number of simplifying assumptions, and we suspect that these  
81 modelling assumptions could be responsible for the unusual results returned by the software.  
82 The most critical assumption in this context is that the evolutionary histories of different gene  
83 families are independent of one another. Thus, an LGT involving a transfer of  $x$  genes would  
84 be considered as  $x$  individual events. Major acquisition events fall completely outside the  
85 scope of the model. To examine the impact of this model misspecification, and to test whether  
86 it can indeed mislead analyses, we inspect the results produced by Count on real data that  
87 evolved by a loss only model, namely chloroplast genomes, to see whether it infers LGT  
88 instead of the true process (loss only). We also investigate two other datasets involving gene  
89 acquisitions via endosymbiosis to see how Count performs.

90

## 91 **Materials and Methods**

### 92 **Data collection and annotation**

#### 93 *Archaeal protein families*

94 The dataset used for the study of the origin of archaeal protein families included 1,981  
95 prokaryotic genomes - 134 archaea and 1,847 bacteria (Nelson-Sathi et al. 2015), hereafter  
96 referred to as AR dataset. The amino acid sequences were retrieved from RefSeq, NCBI  
97 (version June 2012). The dataset consists of 254,938 archaeal proteins in 25,762 protein  
98 families, of which the subset consisting of the import clusters (13,631 archaeal proteins in  
99 2,264 protein families), used in Groussin et al. (2016), was used as well here.

100

101 *Plastid protein families*

102 A dataset encompassing all plastid encoded proteins for 193 photosynthetic  
103 eukaryotes (Schönfeld 2012), designated as the PL dataset, was used. It consists of 254  
104 protein families from 193 sequenced plastid genomes of different eukaryotes, encompassing  
105 6561 protein sequences in total. All sequences were retrieved from RefSeq, NCBI (version  
106 January 2011). Each protein family was manually annotated into Uniprot functional  
107 categories.

108

109 *Eukaryote protein families*

110 The eukaryotic protein dataset was taken from Ku et al. (2015), hereafter referred to as  
111 the EK dataset. It contains 21,146 protein sequences from 55 eukaryotic genomes from six  
112 different supergroups. The dataset was divided into two different matrices: one for 1,060  
113 protein families shared in photosynthetic eukaryotes and densely distributed in cyanobacteria  
114 (6528 sequences, corresponding to block A, B and C in Ku et al. (2015)) and another for  
115 1,397 protein families present in the eukaryotic common ancestor that are likely to correspond  
116 to the origin of the mitochondrion (14,618 sequences corresponding to block E in Ku et al.  
117 (2015)).

118 For each dataset, a PAP was constructed. In the PAPs, each row corresponds to a  
119 species and each column to a protein family, binary elements of the matrix indicate presence  
120 or absence in the respective genome. Phylogenetic reference trees for the AR and EK datasets  
121 were taken from Nelson-Sathi et al. (2015) and Ku et al. (2015) respectively. For the PL  
122 dataset, the reference tree was assembled from Schönfeld (2012) based on Bayesian inference  
123 of trees for the individual genes. Internal nodes are designated as HTUs (hypothetical  
124 taxonomic units), terminal nodes as OTUs (operational taxonomic units).

125

## 126 **BLAST against cyanobacterial genomes**

127         The 15,588 protein sequences in the PL dataset were blasted against 94 cyanobacterial  
128 genomes retrieved from RefSeq, NCBI (version September 2016, listed in Supplemental  
129 Table 1). Hits were filtered with a threshold of e-value equal to or less than  $1e-10$  and local  
130 identity equal to or greater than 25%.

131

## 132 **Calculation of gain and loss events with Count**

133         Version 10.04 of Count (Csűrös, 2010), written in Java, was used. As input, Count  
134 requires a PAP and the corresponding phylogenetic reference tree. Count's three methods for  
135 the analysis of gene evolution – two methods of maximum parsimony, Dollo (DP) and  
136 Wagner (WP) and the phylogenetic birth-and-death model (BD) – were tested. The reference  
137 tree and the appropriate PAP were loaded into Count (branch lengths are ignored in  
138 parsimony models and were not used for the BD model). The data was then optimized using  
139 likelihood, a necessary step in order to use the birth-and-death model. All model parameters  
140 used were the default Count parameters (Groussin et al. 2016). The following settings were  
141 used: the model type was the gain-loss type, the family size distribution at the root was set to  
142 Poisson, lineage-specific variation was left unspecified, the gain variation across families was  
143 set to 1 for the edge length, the loss and the gain rate. The maximum number of optimization  
144 rounds was set to 100 with a convergence threshold on the likelihood of 0.1. The results of the  
145 different methods were displayed for each Count record in the graphical user interface, and  
146 then evaluated using a Perl script. The respective phylogenetic trees were processed and the  
147 results were recorded.

148         Trees were drawn with FigTree from the results provided by Count. The gain and loss  
149 events of the protein families for the respective method were summed and mapped for each

150 corresponding node, respectively, in the phylogenetic tree. For the phylogenetic birth-and-  
151 death model the computed numbers for each protein family were rounded up ( $\geq 0.5$ ) and  
152 down ( $< 0.5$ ) respectively.

153

## 154 **Results**

### 155 **Reproducing Count's results for the origin of archaeal protein families**

156 To reproduce the result of Groussin et al. (2016), we analyzed the subset of the AR  
157 dataset (Nelson-Sathi et al. 2015) that they analyzed using the phylogenetic birth-and-death  
158 model of Count. A comparison (Supplemental Figure 1) shows that the number of gains  
159 calculated here using Count vs gains calculated using Count in Groussin et al. (2016) differed  
160 only very slightly and only for two archaeal groups (Thermococcales - 58 vs 56 - and  
161 Haloarchaea - 219 vs 215). The reasons why Count produced very slight differences for six  
162 out of 568 gain events at the roots of the groups in our hands vs. the results of Groussin et al.  
163 (2016) are not quite clear but they are also neither cause for concern nor the focus of our  
164 interest.

165 More important is the circumstance that Count attributed no gains to the root of the  
166 archaeal tree in our analyses, nor did it do so in Groussin et al. (2016). Supplemental Figure  
167 1b shows the number of different origins per archaeal protein family calculated here for the  
168 AR dataset. For 1,726 of the 2,264 archaeal protein families analyzed, Count calculated a  
169 single gain event, for 451 protein families two different origin events, for 87 families three  
170 different origins and for four of the protein families 6 different origins. For none of the  
171 protein families did Count calculate an origin at the root of the archaeal reference tree  
172 (Groussin et al. 2016).

173

### 174 **Count does not recover a loss only process**

175 To see whether Count can recover even an obvious process of massive gain followed  
176 by differential loss, we examined plastid genomes. It is generally accepted that plastids arose  
177 from cyanobacteria via endosymbiosis (Schwartz and Dayhoff 1978). It is also generally  
178 accepted that plastid genomes underwent reduction during evolution (Ohyama et al. 1986),  
179 that many genes were transferred to the nucleus during evolution and that many gene losses  
180 from cpDNA occurred in independent lineages (Martin et al. 1998; Martin et al. 2002). Figure  
181 1 shows the PAPs for chloroplast encoded proteins in a sample of photosynthetic eukaryotes.  
182 A BLAST search against 94 cyanobacterial genomes (Supplemental Table 1) shows that 95%  
183 of the sequences (highlighted in Supplemental Figure 2) have readily identifiable homologs in  
184 cyanobacteria. The tree is rooted with *Cyanophora*, but other roots, including the red lineage  
185 have been proposed (Rodríguez-Ezpeleta et al. 2005).

186

187

**-Figure 1 here-**

188

189 Regardless of whether we use the parsimony or the birth-and-death options of Count,  
190 the program only counts about half of the 254 protein families as being present in the plastid  
191 ancestor (Figure 2 and Figure 3a). The other half of the (n.b.) plastid-encoded proteins are  
192 reconstructed by Count to have been acquired after the initial plastid, during plant evolution.  
193 That is, Count indicated that the primary endosymbiotic event involved acquisition of half a  
194 plastid followed by later acquisition of the other half via LGT events in independent lineages.  
195 In the birth-and-death model that Groussin et al. (2016) used, Count reports that 86 protein  
196 coding genes were acquired once and 36 protein coding genes were acquired twice in the  
197 process of lineage diversification during plastid evolution. That is, Count calculates that those  
198 122 genes were acquired from cyanobacteria after lineage divergence during plant evolution  
199 and then laterally transferred among eukaryotes. Count does not specify donor or recipient

200 lineages. Another five protein coding genes were acquired three times during plastid  
201 evolution.

202 In the 112 years since Mereschkowsky (1905) suggested that plastids arose from  
203 cyanobacteria, no one has seriously proposed a stepwise acquisition of plastid genomes.  
204 Rather, plastid endosymbiosis operates via mass acquisition of genes at the cyanobacterial  
205 origin of the organelle, followed by gene loss and transfer to the nucleus (Martin and Müller  
206 1998; Martin and Herrmann 1998; Timmis et al. 2004; Archibald 2015). Count however  
207 delivers a result that clearly suggests "continuous" LGT into and among the members of the  
208 eukaryotic lineage in order to construct plastids "on the fly" in independent eukaryotic  
209 lineages. That is important because the central argument of Groussin et al (2016) was that  
210 Count "*supports the continuous acquisition of genes over long periods in the evolution of*  
211 *Archaea*". The suspicion is that Count is biased towards the inference of continuous  
212 acquisition and does not recover expected events of periodic massive gains followed by  
213 gradual differential loss even when that is the true process. Hence, this raises serious concerns  
214 about the critique by Groussin et al (2016) as their conclusions are likely a misleading  
215 outcome of the program they used, not an attribute of the data they analyzed or the  
216 evolutionary process that generated it.

217

218 **-Figure 2 here-**

219

220 Figure 2 shows the gain events calculated by the three models plotted against the  
221 reference tree. Eleven is the maximum number of gains at an OTU for the BD model (also  
222 high for WP with 17 gains) at *Pyramimonas parkeae*, a model organism for early-evolved  
223 Viridiplantae (Satjarak and Graham 2017). Wagner Parsimony places the highest number of  
224 gain events (nineteen) at *Nephroselmis olivacea*, which is considered a descendant of the

225 earliest-diverging green algae (Turmel et al. 1999). It should be noted that all models place a  
226 considerable number of gain events at the common ancestor of Rhodophyta, Hacrobia and  
227 SAR.

228 Wagner Parsimony predicts the largest number of different gain events for the same  
229 protein families (Figure 3a) – eight different origins for ycf20, a family of unknown function  
230 and nine for cystT, a sulfate transporter. The BD model predicts a maximum of 4 different  
231 origins for ycf47, a poorly characterized probable protein exporter in thylakoid membranes.  
232 Strikingly, Dollo Parsimony does not predict more than one origin for any family, with only  
233 one gain event for all other 129 proteins occurring somewhere else throughout the tree. In  
234 other analyses (Martin et al. 2002) the corresponding patterns were identified as being the  
235 result of multiple independent gene losses. Both the BD and WP models predict a large  
236 number of gain events at the leaves of the reference tree – 43 and 147, respectively. (Figure  
237 3b).

238 All three models in Count calculate at least one loss event per protein family for more  
239 than half of the families in the dataset (Supplemental Figure 3). However, the number of gains  
240 (LGTs or convergent gene sequence homology origin) and losses per protein family is on the  
241 same order of magnitude. This is evident on the result of the functional annotation of gain and  
242 loss events done for the PL dataset (Figure 4). We annotated 224 of the 254 families. With the  
243 exception of Dollo Parsimony for photosystem II proteins and Calvin cycle, the tree models in  
244 Count predict at least one gene gain event in all the functional categories.

245

246 **-Figure 4 here-**

247

248 **The birth-and-death model of endosymbiosis events**

249 Current views of eukaryote origin have it that eukaryotes arose from a symbiotic  
250 association between an archaeal host lineage and a mitochondrial endosymbiont (McInerney  
251 et al. 2014; Zaremba-Niedzwiedzka et al. 2017; Martin et al. 2017b) involving gene transfers  
252 from endosymbiont to host (Timmis et al. 2004; Thiergart et al. 2012). The origin of plastids  
253 entailed an additional influx of genes at the origin of the plant lineage (Ku et al. 2015). Thus,  
254 mitochondria and plastids each are currently understood to have had different, single origins,  
255 where large portion of the endosymbiont genomes entered the eukaryotic lineage. We  
256 checked the ability of the birth-and-death model from Count to recover the massive episodic  
257 gene acquisition events at the origin of eukaryotes and chloroplasts, using PAPs prepared  
258 from the EK dataset (Ku et al. 2015). The distribution of those families is shown in Figure 5,  
259 which is reproduced with permission from Ku et al. (2015).

260

261 **-Figure 5 -**

262

263 Indeed, Count's BD model placed 1410 of all 2972 origin events for Group E proteins  
264 on the terminal edges of the phylogenetic reference tree (Figure 6a). The largest number of  
265 different gain events in a single OTU - 98 - was calculated for *Amphimedon queenslandica*, a  
266 sponge species known as a model for studying the origin and early evolution of animals  
267 (Srivastava et al. 2010). At the inner nodes of the tree the gain events were distributed almost  
268 uniformly, with only eight of the 53 inner nodes receiving no gain events with Count.

269 Out of 1,397 eukaryotic protein families belonging to Group E (see Figure 5) Count  
270 calculated that only 172 had a single origin at the root and no other gains anywhere else on  
271 the tree (Figure 6b). An additional 168 mitochondrial families were present at the root,  
272 however with additional origins spread throughout the tree (between one and 5 different  
273 origins). For 885 of the Group E protein families Count calculated between two and eight



274 independent gain events (from prokaryotes via LGT or via eukaryote-eukaryote LGT). Count  
275 places a massive number of gain events at the leaves - 1410 - for the Group E protein families  
276 (Figure 6c). It is important to recall that for the 2585 genes families present in eukaryotes and  
277 prokaryotes in the data set of Ku et al. (2015), 87% show evidence for a single origin at the  
278 root using maximum likelihood methods (Ku et al. 2015). By contrast, Count reports that  
279 eukaryotes have acquired 88% of their genes independently from prokaryotes, but *from the*  
280 *same prokaryotic* donor each time, because otherwise the gene trees would not reflect a single  
281 origin relative to prokaryotic homologues (Ku et al. 2015). Clearly, Count does not model  
282 adequately mass acquisitions such as those incurred at endosymbiotic events that gave rise to  
283 organelles.

284 In the case of plastid families (Group A, B, and C in Figure 5), the genes for which are  
285 conspicuously widespread among cyanobacteria (Figure 5), Count produces the same effect:  
286 only 38 proteins out of 1060 originate once and at the root of the subtree for plastid-  
287 containing species (Figure 6a and 6b). Count attributes another 191 families to the root and  
288 with additional origins elsewhere on the tree (between two and five different origins).  
289 According to Count, eukaryotes and plastids would have been acquiring the genes for the  
290 proteins that they need to survive “on the fly”, that is via independent gains (of the same  
291 genes in independent lineages) during eukaryotic origin.

292 Furthermore, phylogenetic testing has shown that the vast majority of eukaryotic  
293 proteins in Group A, B, C, and E having homologues in prokaryotes are monophyletic, such  
294 that a single origin, not multiple origins, is the preferred model (Ku et al. 2015). Count does  
295 not recover that aspect of the data. Moreover, Ku et al. (2015) tested to see whether eukaryote  
296 to eukaryote LGT could account for the patchy distribution of the eukaryotic genes in Figure  
297 5. The result was that gene evolution in eukaryotes is resoundingly vertical (Ku et al. 2015),  
298 not lateral as in prokaryotes, hence the many independent origins (LGT) that Count infers do

299 not reconcile with the phylogenies of the proteins underlying the PAPs with which Count  
300 operates. Out of the 1,761 calculated origins of the different plastid protein families, 339,  
301 almost a fifth, were found at leaves (Figure 6c). In only nine out of the 31 inner nodes of the  
302 plastid subtree there were no gain events of plastid families. Again, for the 2585 genes  
303 families present in eukaryotes and prokaryotes in the data set of Ku et al. (2015), 87% show  
304 evidence for a single origin at the eukaryotic root using maximum likelihood methods (Ku et  
305 al. 2015).

306 By contrast, Count reports that plastid bearing eukaryotes have acquired 96% of their  
307 genes independently from prokaryotes, but *from the same prokaryotic* donor each time,  
308 because otherwise the gene trees would not reflect a single origin relative to prokaryotic  
309 homologues (Ku et al. 2015). Clearly, Count is doing something very unusual with PAP data  
310 in the case of mass acquisitions such as those incurred at endosymbiotic events that give rise  
311 to organelles. The same is almost certainly true for the mass acquisitions in archaea, where  
312 Count imposes a uniform process of acquisition upon the data, regardless of what the true  
313 process was.

314

315 **-Figure 6 here-**

316

## 317 **Discussion**

318 LGT is important in archaea (Wagner et al. 2017). Two recent studies have indicated  
319 that in archaea, gene acquisitions from bacteria can be episodic (Nelson-Sathi et al. 2012;  
320 Nelson-Sathi et al. 2015), similar results were found for transfers at the origin of eukaryotes  
321 and at the origin of plastids (Ku et al. 2015). Groussin et al. (2016) used the results of Count  
322 (Csűrös 2010) as evidence that LGT in archaea is uniform, not episodic. We checked to see if  
323 Count could recognize loss-only as the true model. We investigated proteins encoded in

324 plastid genomes, which were sequestered from the cyanobacterial lineage ca. 1.6 billion years  
325 ago and have been vertically inherited in eukaryotes since, except during secondary  
326 endosymbiotic events. We analyzed the three different methods for ancestral reconstruction  
327 available in Count: the birth-and-death (BD) model, Dollo Parsimony (DP), and Wagner  
328 Parsimony (WP). The results obtained show that with BD and WP, Count distributes the  
329 origin of eukaryotic protein families uniformly throughout the tree and that more than one  
330 eukaryote LGT event is often calculated for the same protein family. With DP, there are also  
331 gain events throughout the tree, although not at the leaves (OTUs) and not twice for the same  
332 family.

333         The results of Count would suggest a process of continuous LGT for plastids and for  
334 eukaryotes, which runs counter to data (Ku et al. 2015; Ku and Martin 2016), the standard  
335 Darwinian paradigm of eukaryote evolution (Martin 2017), and eukaryote diploid genetics  
336 (Charlesworth et al. 2017). Count has it that different eukaryotic lineages independently  
337 assembled the collections of genes that make them eukaryotic (Figure 6) and that plastids  
338 independently assembled their genomes to look like reduced cyanobacterial genomes (Figure  
339 2 and 3). Such inferences cannot be true.

340         The results from Count, while unusual, can be easily explained as a consequence of  
341 the assumption of independence of gene families. Clearly this assumption is violated in the  
342 cases of acquisition and loss studied here. However, the assumption could also distort  
343 inferences made in a more general setting (Lassalle et al. 2017). There are two main, but  
344 related, effects. Firstly, the relative cost, to parsimony scores of likelihood, of LGTs are  
345 skewed. It becomes cheaper to posit separate LGTs for each gene family. Secondly, the  
346 independence of family means that the history for each gene family is inferred separately with  
347 no sharing of information across families. As each gene history is inferred using only the PAP  
348 for that family, the position of LGTs fit individually irrespective of whether they make sense

349 in the larger context. The result is a classic case of overfitting, akin to an interpolating curve  
350 which bends and stretches to fit through every single data point.

351 This is not a theoretical criticism: we have shown here that this problem has real and  
352 significant impact on inference. In particular, the systematic error explains the failure of  
353 Groussin et al. (2016) to recover the patterns of archaeal LGT discovered in Nelson-Sathi et  
354 al. (2015).

355 The incorporation of dependence between gene families into methods like Count  
356 would be challenging both computationally and mathematically. Significant progress towards  
357 a heuristic solution has been made recently by Lassale et al. (2017). However, it could be still  
358 impossible to distinguish convincingly between different scenarios based only on PAP data,  
359 there is simply insufficient information per gene family, and it might be statistically  
360 impossible to discriminate between radically different histories. The tests implemented by  
361 Nelson-Sathi et al. (2015) lacked the statistical power of full likelihood-based methods (Yang  
362 et al. 2007), but on the other hand made few assumptions on the process of LGT  
363 accumulation, gaining some robustness in turn.

364

## 365 **Acknowledgments**

366 This work was supported by grants from the ERC (666053) and the Volkswagen  
367 Foundation (93 046) to WFM, the German Israeli Foundation [(I-1321-203.13/2015] to WFM  
368 and EHC, the Open University of Israel Research fund (504735) to EHC, the Department of  
369 Science and Technology INSPIRE Faculty Award (DST/INSPIRE/04/2015/002935) to SN-S  
370 and the New Zealand Bio-Protection Research Centre 2017 PI funding allocation to PJJ.

371

## 372 **FIGURE LEGENDS**

373

374 **Fig. 1: Presence-absence pattern of plastid protein families of the PL dataset.** Each black  
375 tick indicates the presence of a protein in an OTU. The number of protein families is indicated  
376 on the x axis. On the right side of the matrix are the OTUs, on the left the corresponding  
377 phylogenetic reference tree. Groups containing secondary plastids are marked with an \*.

378

379 **Fig. 2: Phylogenetic reference tree for the PL dataset with mapped gain events**  
380 **calculated with Count's traditional phylogenetic methods.** Gain events for plastid protein  
381 families are depicted at the respective nodes in the following order, separated by slashes:  
382 Birth-and-Death model; Dollo Parsimony (only in the inner nodes); Wagner Parsimony. Inner  
383 and outer nodes where no values are plotted have no gain events according to the calculations  
384 of Count.

385

386 **Fig. 3: Multiple origins for the same protein families in the PL dataset calculated by**  
387 **Count. (a)** Number of different gains per protein family (split by gains only in nodes or at the  
388 root and nodes) for each phylogenetic model in Count; single origins at the root are  
389 highlighted in black; a gradient from blue to red shows multiple origins for the same protein  
390 family. **(b)** Number of origins in the outer nodes of the tree for each phylogenetic model in  
391 Count.

392

393 **Fig. 4: Gain and loss events for functional categories of protein families in the PL**  
394 **dataset.** The manual annotation resulted in 20 categories listed on the y axis, sorted by the  
395 prevalence in the PAP (in parenthesis the total number of families in each category). Lost and  
396 gain events are shown on the left (greens) and right (oranges) side of the barplot, in the same  
397 scale, for the 3 different models in Count.

398

399 **Fig. 5. Gene distributions for eukaryotic genes.** Reproduced with permission from Ku et al.  
400 (2015).

401

402 **Fig. 6: Gain events calculated by Count's birth-and-death model for mitochondrial and**  
403 **plastid protein families in the EK dataset. (a)** Reference tree for eukaryotes with  
404 mitochondrial and plastid origin events depicted at the respective nodes (separated by  
405 slashes), in this order. On the right, the 6 supergroups and the individual species (complete  
406 names in Supplemental Table 2) are shown. The root for the plastid subtree is highlighted  
407 with a star (\*). **(b)** Number of different gains per protein family (split by gains only in nodes  
408 or at the roots of each organelle's tree and nodes) for each phylogenetic model in Count;  
409 single origins at the root are highlighted in black; a gradient from blue to red shows multiple  
410 origins for the same protein family. **(c)** Number of origins in the outer nodes of the tree for  
411 each phylogenetic model in Count.

412

## 413 **References**

414

415 Albalat R, Cañestro C. 2016. Evolution by gene loss. *Nat. Rev. Genet.* 17:379–391.

416 Archibald JM. 2015. Endosymbiosis and Eukaryotic Cell Evolution. *Curr. Biol.* 25:911:921

417 Charlesworth D, Barton NH, Charlesworth B. 2017. The sources of adaptive variation. *Proc.*  
418 *Biol. Sci.* 284:20162864.

419 Csűrös M. 2010. Count: Evolutionary analysis of phylogenetic profiles with parsimony and  
420 likelihood. *Bioinformatics.* 26:1910–1912.

421 Dagan T, Martin W. 2007. Ancestral genome sizes specify the minimum rate of lateral gene  
422 transfer during prokaryote evolution. *Proc. Natl. Acad. Sci. U. S. A.* 104:870–875.

- 423 Daubin V, Moran NA, Ochman H. 2003. Phylogenetics and the cohesion of bacterial  
424 genomes. *Science*. 301:829-832.
- 425 Groussin M et al. 2016. Gene acquisitions from bacteria at the origins of major archaeal  
426 clades are vastly overestimated. *Mol. Biol. Evol.* 33:305–310
- 427 Ku C et al. 2015. Endosymbiotic origin and differential loss of eukaryotic genes. *Nature*.  
428 524:427–432.
- 429 Ku C, Martin WF. 2016. A natural barrier to lateral gene transfer from prokaryotes to  
430 eukaryotes revealed from genomes: the 70 % rule. *BMC Biol.* 14:89.
- 431 Lassalle F et al. 2017. Ancestral genome estimation reveals the history of ecological  
432 diversification in *Agrobacterium*. *Genome Biol. Evol.* 9:3413-3431.
- 433 Martin WF, Müller M. 1998. The hydrogen hypothesis for the first eukaryote. *Nature*.  
434 392:37–41.
- 435 Martin WF, Herrmann RG. 1998. Gene transfer from organelles to the nucleus: how much,  
436 what happens, and Why? *Plant Physiol.* 118:9–17.
- 437 Martin WF et al. 1998: Gene transfer to the nucleus and the evolution of chloroplasts. *Nature*  
438 393:162–165.
- 439 Martin WF et al. 2002. Evolutionary analysis of *Arabidopsis*, cyanobacterial, and chloroplast  
440 genomes reveals plastid phylogeny and thousands of cyanobacterial genes in the nucleus.  
441 *Proc. Natl. Acad. Sci. USA.* 99:12246–12251.
- 442 Martin WF et al. 2017a. Late mitochondrial origin is an artefact. *Genome Biol. Evol.* 9:373-  
443 379.
- 444 Martin WF, Tielens AGM, Mentel M, Garg SG, Gould SB. 2017b. The physiology of  
445 phagocytosis in the context of mitochondrial origin. *Microbiol. Mol. Biol. Rev.* 81:e00008-

- 446 17.
- 447 Martin WF. 2017. Too much eukaryote LGT. *BioEssays*. 39:1700115.
- 448 McInerney JO, O'Connell MJ, & Pisani D. 2014. The hybrid nature of the Eukaryota and a  
449 consilient view of life on Earth. *Nat. Rev. Microb.* 12:449.
- 450 Mereschkowsky C. 1905. Über Natur und Ursprung der Chromatophoren im Pflanzenreiche.  
451 *Biol. Zent. Bl.* 25:593–604.
- 452 Nelson-Sathi S et al. 2012. Acquisition of 1,000 eubacterial genes physiologically  
453 transformed a methanogen at the origin of Haloarchaea. *Proc. Natl. Acad. Sci. USA*.  
454 109:20537–20542.
- 455 Nelson-Sathi S et al. 2015. Origins of major archaeal clades correspond to gene acquisitions  
456 from bacteria. *Nature*. 517:77–80.
- 457 Ohyama K. et al. 1986. Chloroplast gene organization deduced from complete sequence of  
458 liverwort *Marchantia polymorpha* chloroplast DNA. *Nature*. 322:572-574
- 459 Popa O, Dagan T. 2011. Trends and barriers to lateral gene transfer in prokaryotes. *Curr.*  
460 *Opin. Microbiol.* 14:615–623.
- 461 Rodríguez-Ezpeleta N et al. 2005. Monophyly of primary photosynthetic eukaryotes: green  
462 plants, red algae, and glaucophytes. *Curr. Biol.* 15:1325-1330.
- 463 Schönfeld B. 2012. The pattern and processes of genome change in endosymbionts old and  
464 new. Institute of Molecular BioSciences, Massey University, New Zealand (Doctoral  
465 dissertation).
- 466 Schwartz RM, Dayhoff MO. 1978. Origins of prokaryotes, eukaryotes, mitochondria, and  
467 chloroplasts. *Science*. 199:395–403.



- 468 Satjarak A, Graham LE. 2017. Genome-wide analysis of carbohydrate-active enzymes in  
469 *Pyramimonas parkeae* (Prasinophyceae). *J. Phycol.* 53:1072-1086
- 470 Srivastava M et al. 2010. The *Amphimedon queenslandica* genome and the evolution of  
471 animal complexity. *Nature.* 466:720–726.
- 472 Szöllősi GJ, Tannier E, Daubin V, Boussau B. 2015a. The inference of gene trees with  
473 species trees. *Syst. Biol.* 64:e42-e62.
- 474 Szöllősi GJ, Davin AA, Tannier E, Daubin V, Boussau B. 2015b. Genome-scale phylogenetic  
475 analysis finds extensive gene transfer among fungi. *Phil. Trans. R. Soc. Lond. B.*  
476 370:20140335.
- 477 Thiergart T, Landan G, Schenk M, Dagan T, Martin WF. 2012. An evolutionary network of  
478 genes present in the eukaryote common ancestor polls genomes on eukaryotic and  
479 mitochondrial origin. *Genome Biol. Evol.* 4:466–485.
- 480 Timmis JN, Ayliffe MA, Huang CY, Martin WF. 2004. Endosymbiotic gene transfer:  
481 organelle genomes forge eukaryotic chromosomes. *Nat. Rev. Genet.* 5:123–135.
- 482 Turmel M, Otis C, Lemieux C. 1999. The complete chloroplast DNA sequence of the green  
483 alga *Nephroselmis olivacea*: insights into the architecture of ancestral chloroplast genomes.  
484 *Proc Natl Acad Sci USA.* 96:10248–10253.
- 485 Wagner A et al. 2017 Mechanisms of gene flow in archaea. *Nat. Rev. Microbiol.* 15:492-501.
- 486 Williams TA, Foster PG, Cox CJ, Embley TM. 2013. An archaeal origin of eukaryotes  
487 supports only two primary domains of life. *Nature.* 504:231–236.
- 488 Yang Z. 2007. PAML 4: Phylogenetic Analysis by Maximum Likelihood. *Mol. Biol. Evol.*  
489 4:1586-1591.

490 Zaremba-Niedzwiedzka K et al. 2017. Asgard archaea illuminate the origin of eukaryotic  
491 cellular complexity. Nature 541:353-358.

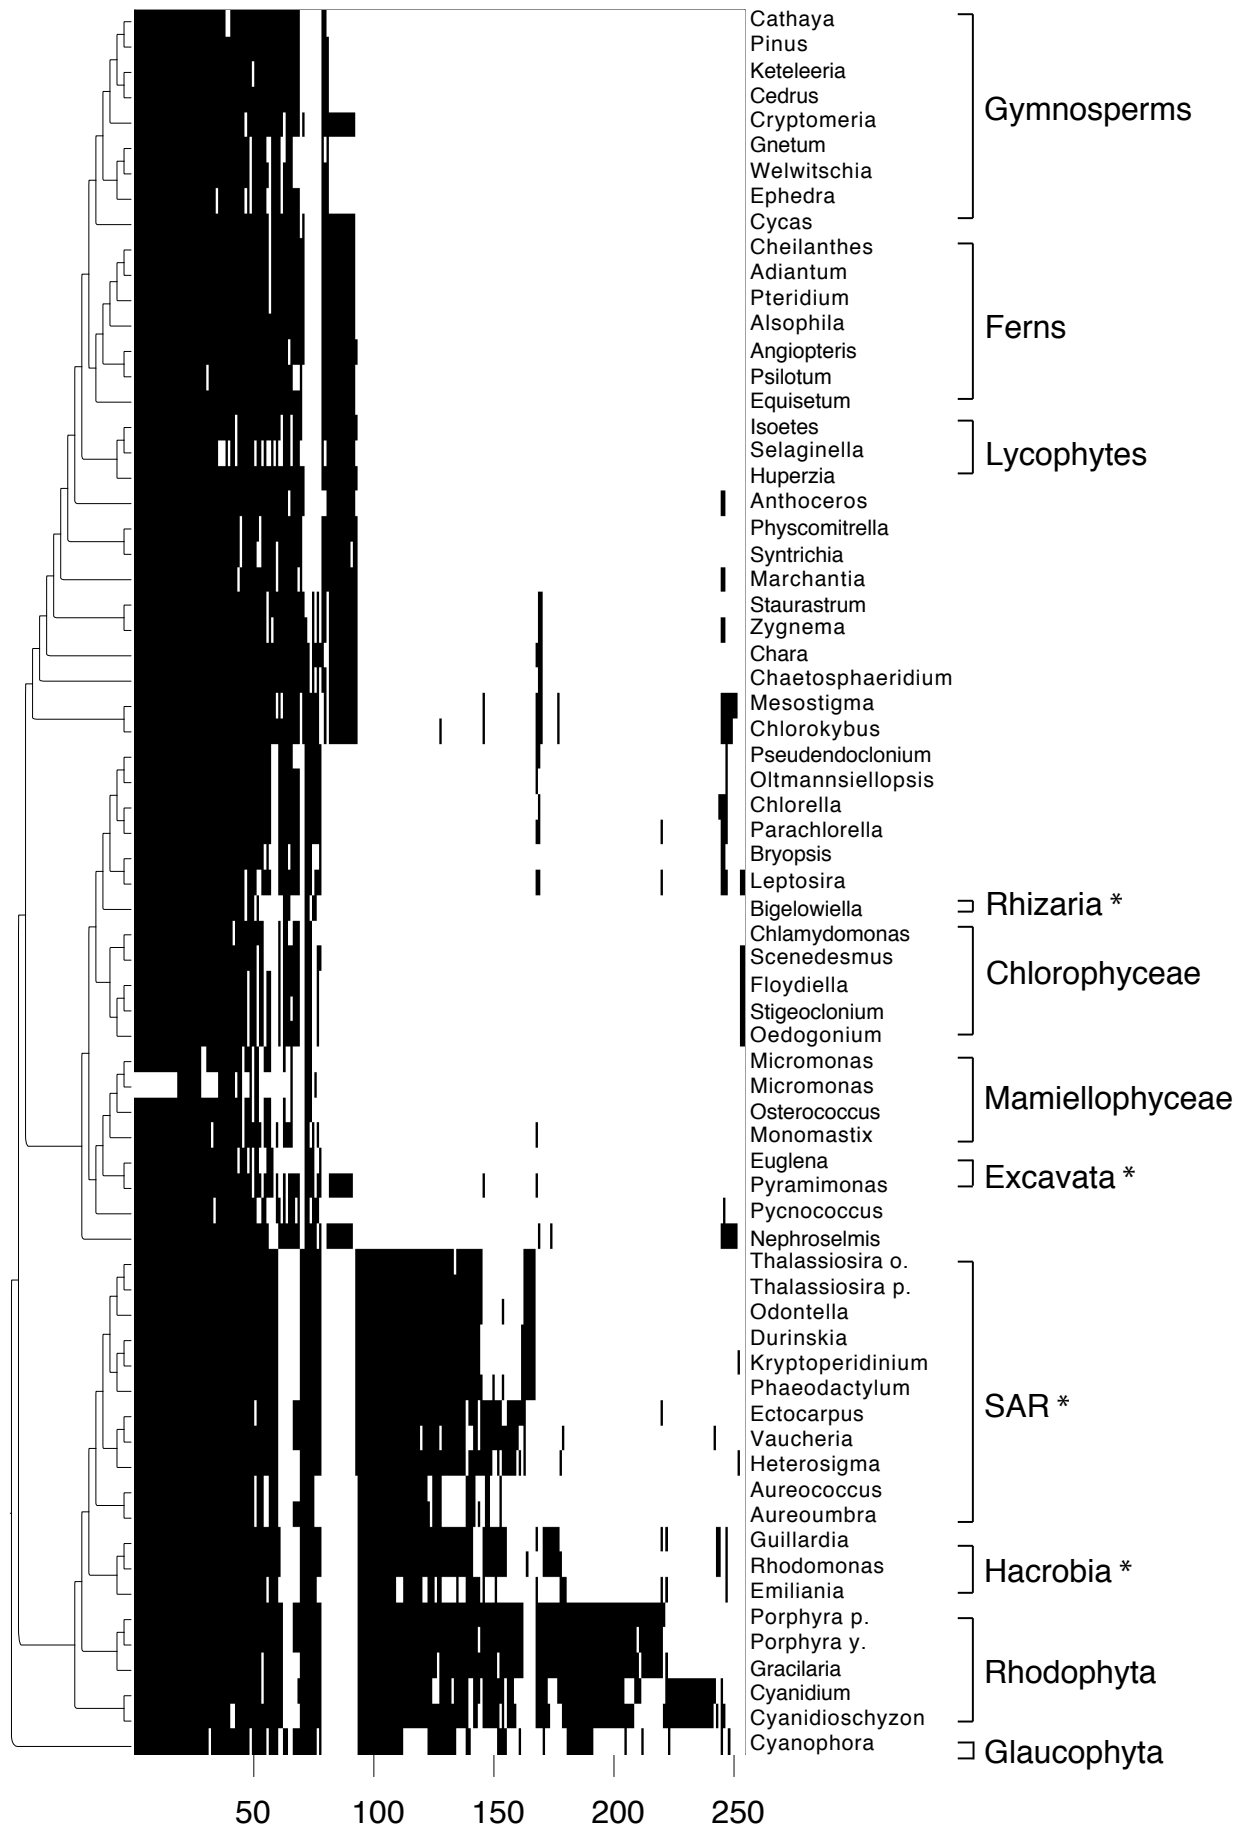

Figure 1

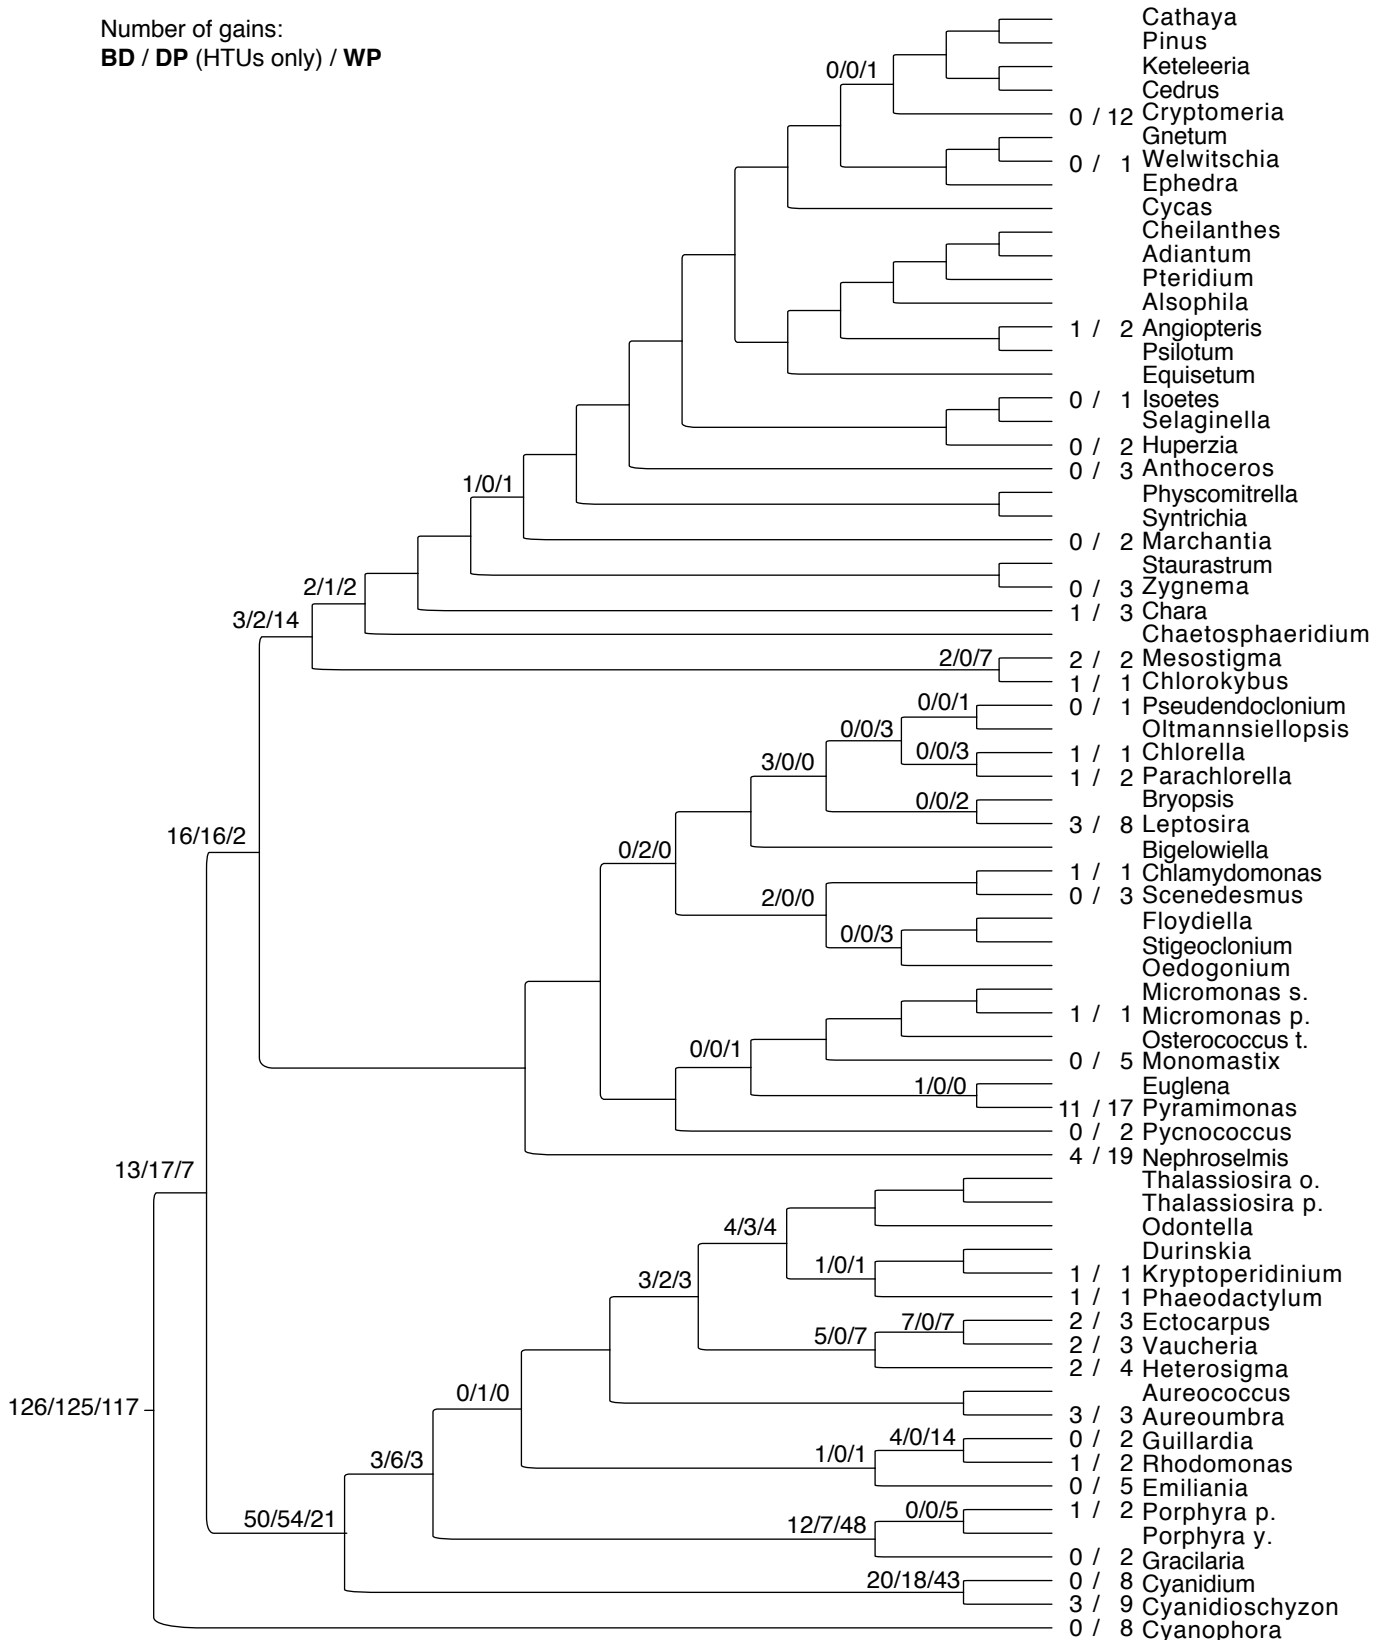

Figure 2

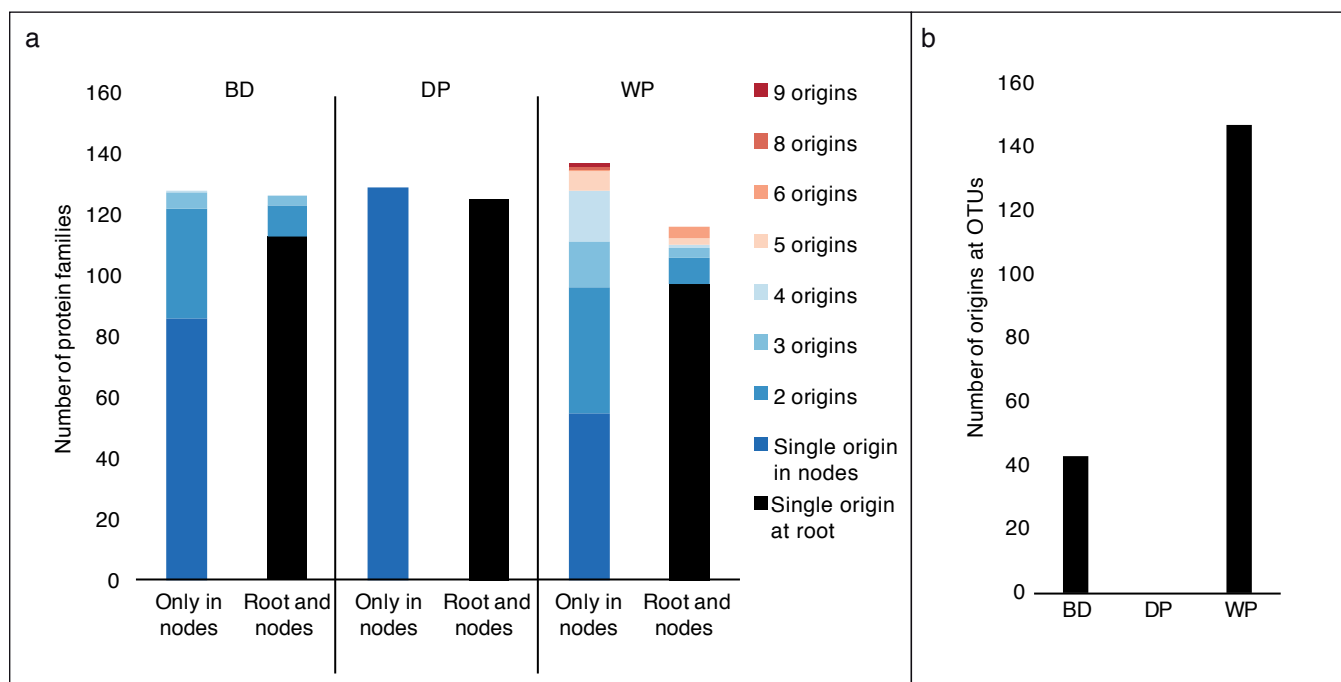

Figure 3

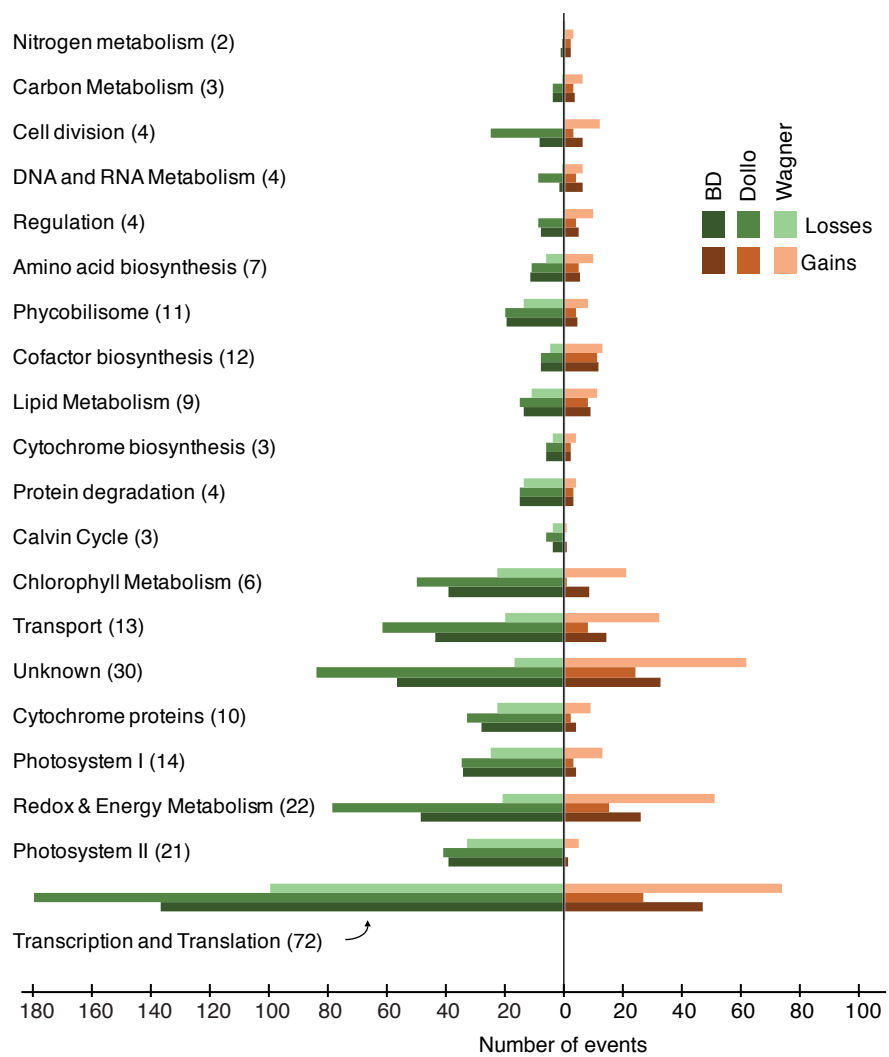

Figure 4

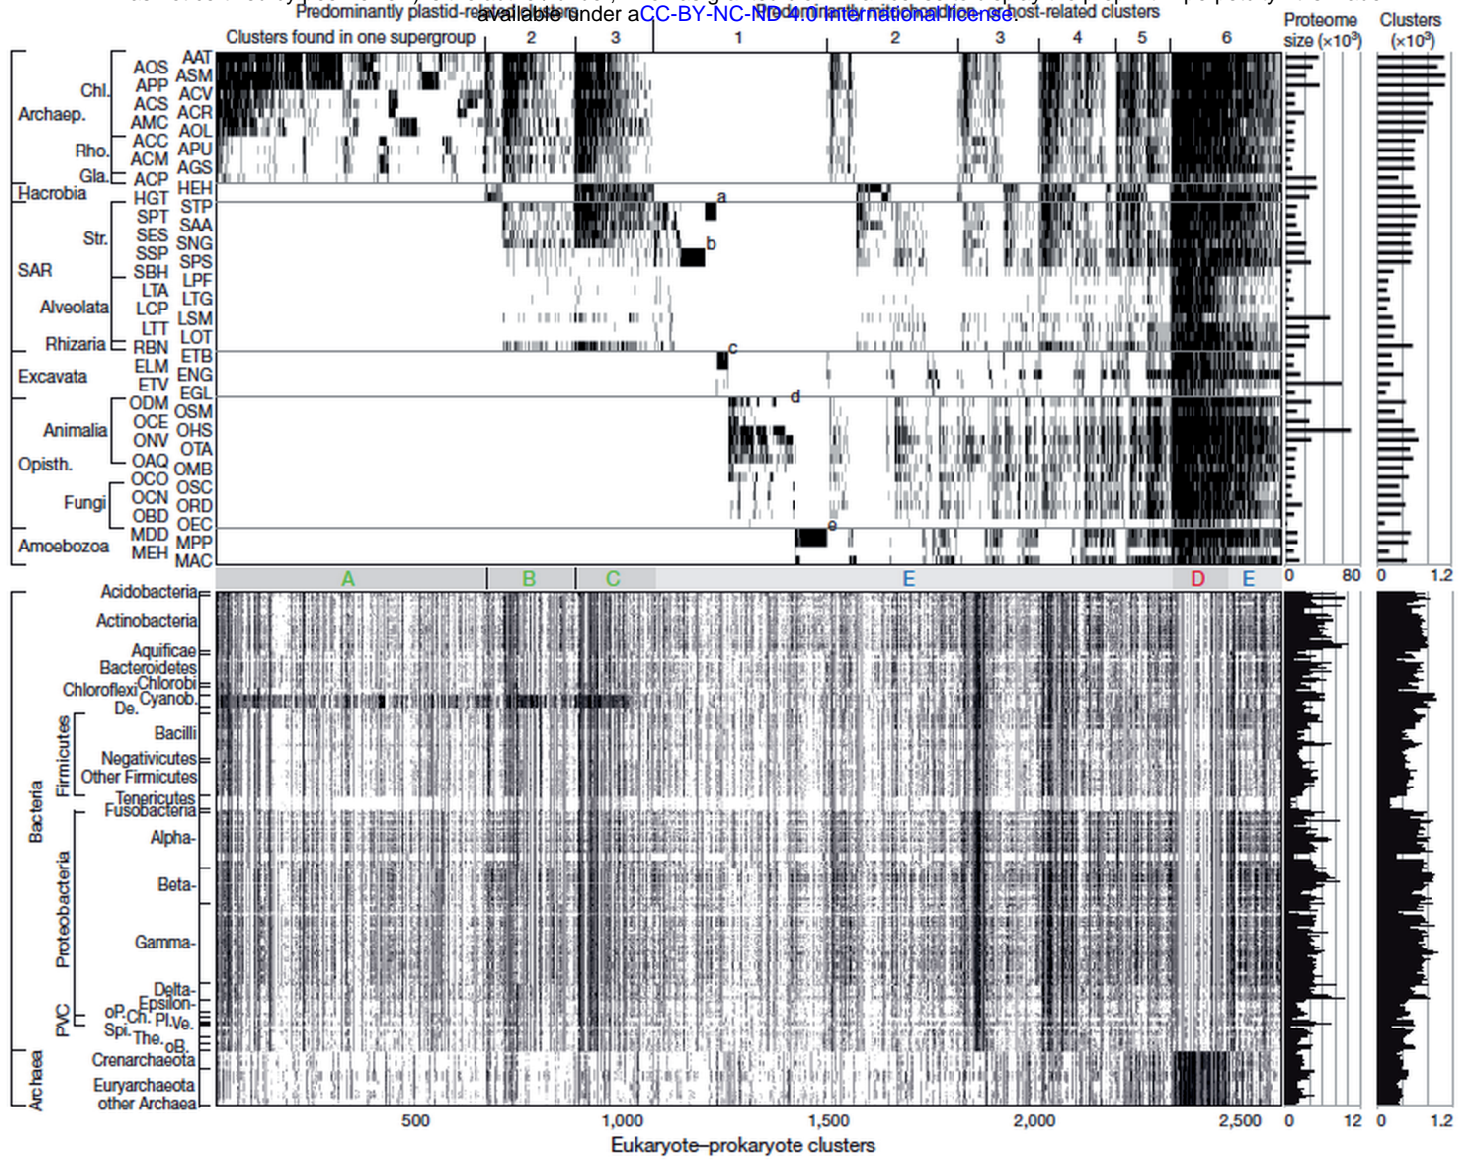

Figure 5

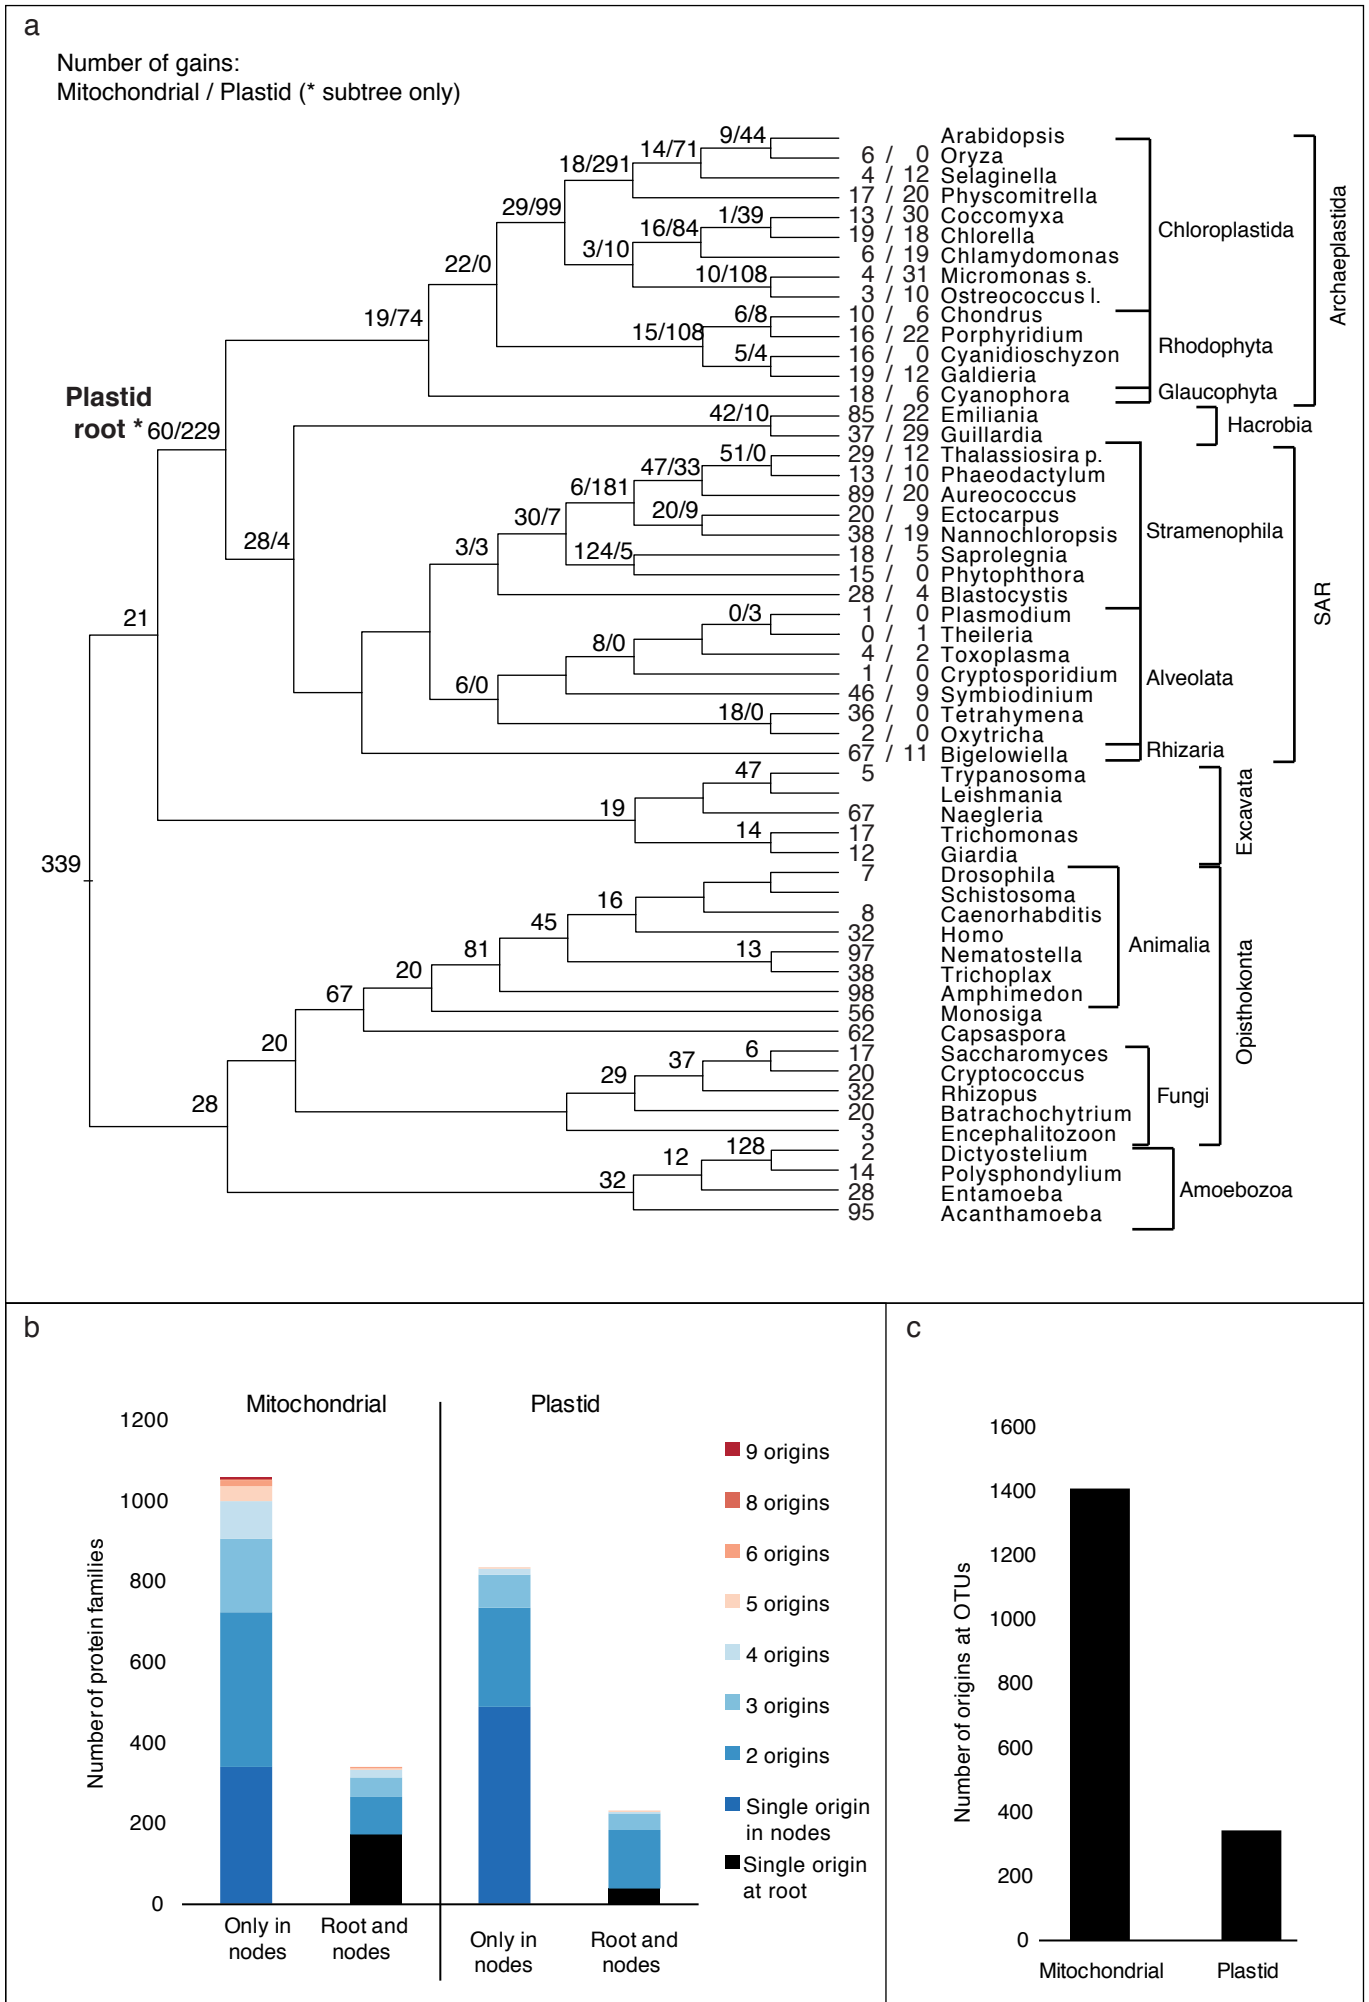

Figure 6
